# Supplementary material
Source: PubMed Central journal article supplement (PMC4226138)
Supplement: NIHMS639227-supplement-01.pdf [file NIHMS639227-supplement-01.pdf]

# Supplementary Figure 1

## A. Map-wise ICC

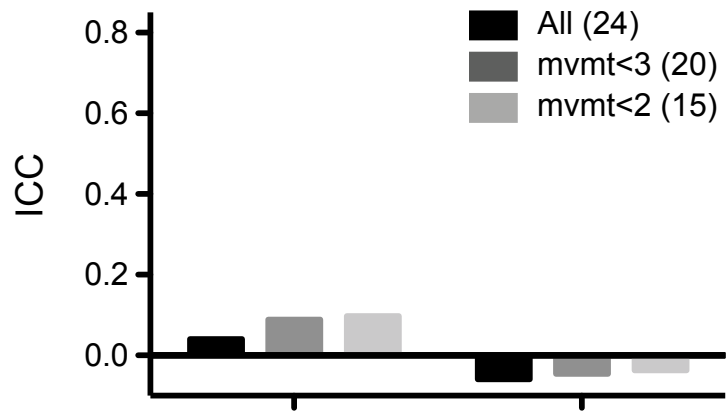

## B. Node-wise ICC

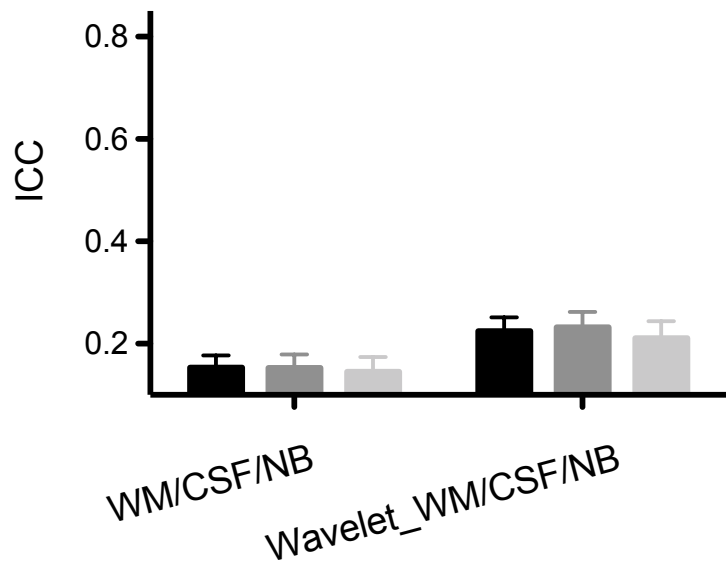

Supplementary Table 1

|            | Map-wise                                               | Unit-wise                         |
|------------|--------------------------------------------------------|-----------------------------------|
| Seed-based | ROI connectivity map<br>(mean of all voxels' z scores) | Voxel<br>(z score)                |
| ROI matrix | Matrix<br>(mean of all pairs' z scores)                | ROI pair<br>(z score)             |
| Graph      | Graph<br>(mean of all nodes' graph metrics: K/C/B)     | ROI node<br>(graph metric: K/C/B) |
| ICA        | ICA component<br>(mean of all voxels' z scores)        | Voxel<br>(ICA component z score)  |
| TC-GICA    | ICA component<br>(mean of all voxels' z scores)        | Voxel<br>(ICA component z score)  |
